# Supplementary material for: A population modification gene drive targeting both Saglin and Lipophorin impairs Plasmodium transmission in Anopheles mosquitoes
Source: eLife journal article supplement (doi:10.7554/elife.93142), 2023-12-05

# Inheritance dynamics of the two transgenes

*SagGDvasa* (DsRed) and *Lp::Sc2A10* (GFP)

in 8 mosquito populations, tracked by COPAS flow cytometry

Typical COPAS analysis :

Objects separated according to size and opacity

Objects from first gate separated according to fluorescence

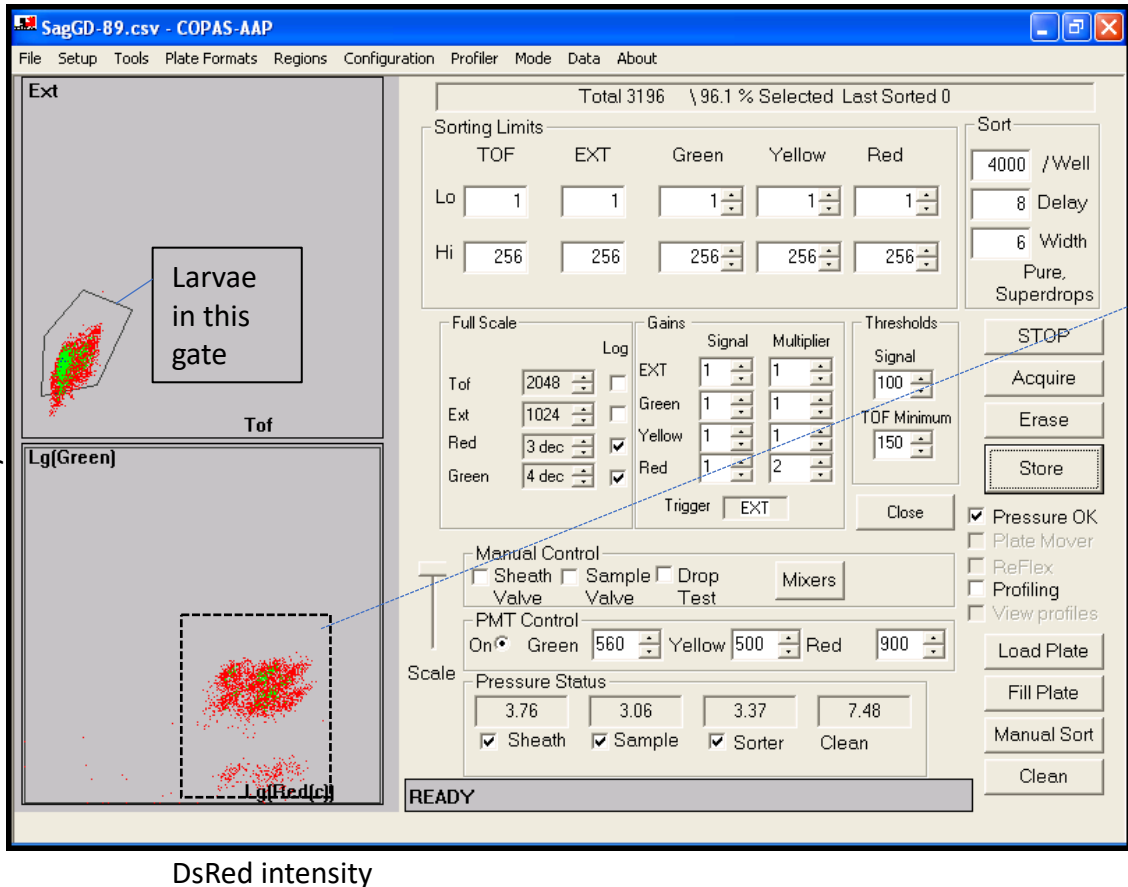

Extract screenshots of region with larvae

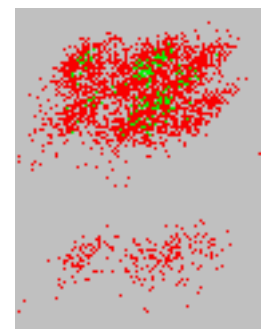

Interpretation of fluorescence :

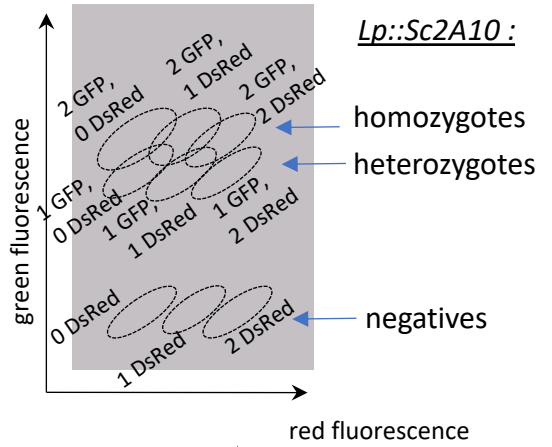

*SagGDvasa* :

negatives  
heterozygotes  
homozygotes

Population 1 : G0 = ♂  $\frac{SagGD^{vasa}}{Y}$  ;  $\frac{Lp::Sc2A10}{+}$  x ♀ WT

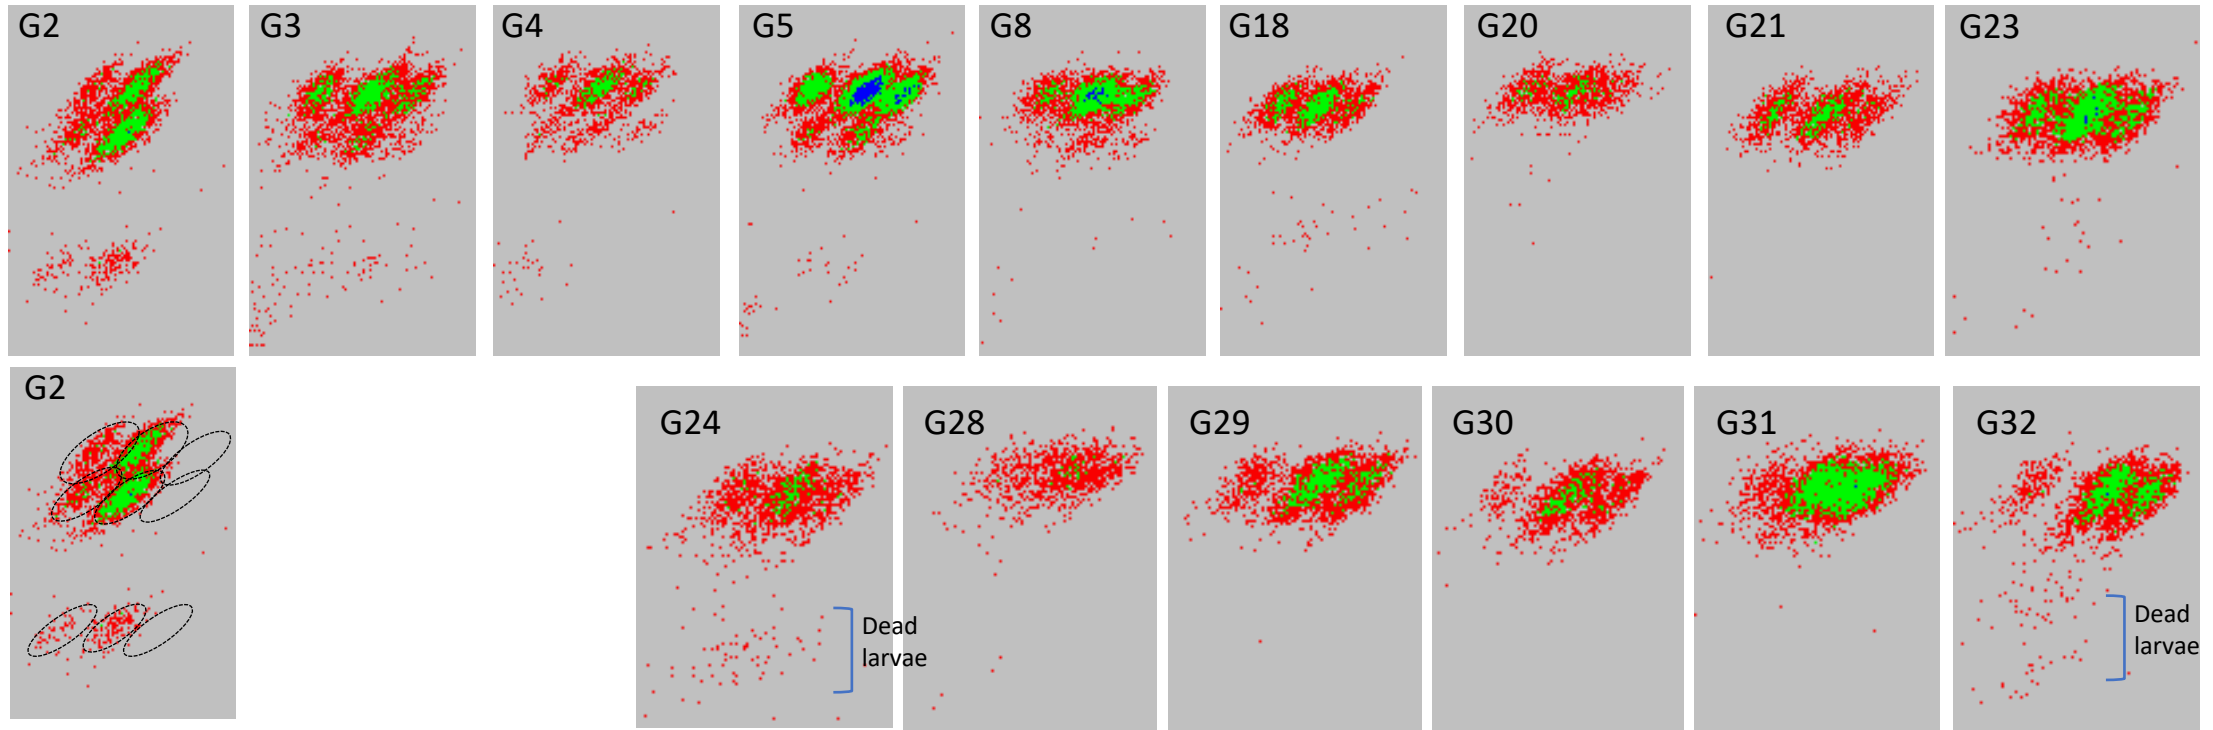

Population 2 : G0 = ♂  $\frac{SagGD^{vasa}}{Y}$  ;  $\frac{Lp::Sc2A10}{+}$  x ♀ WT

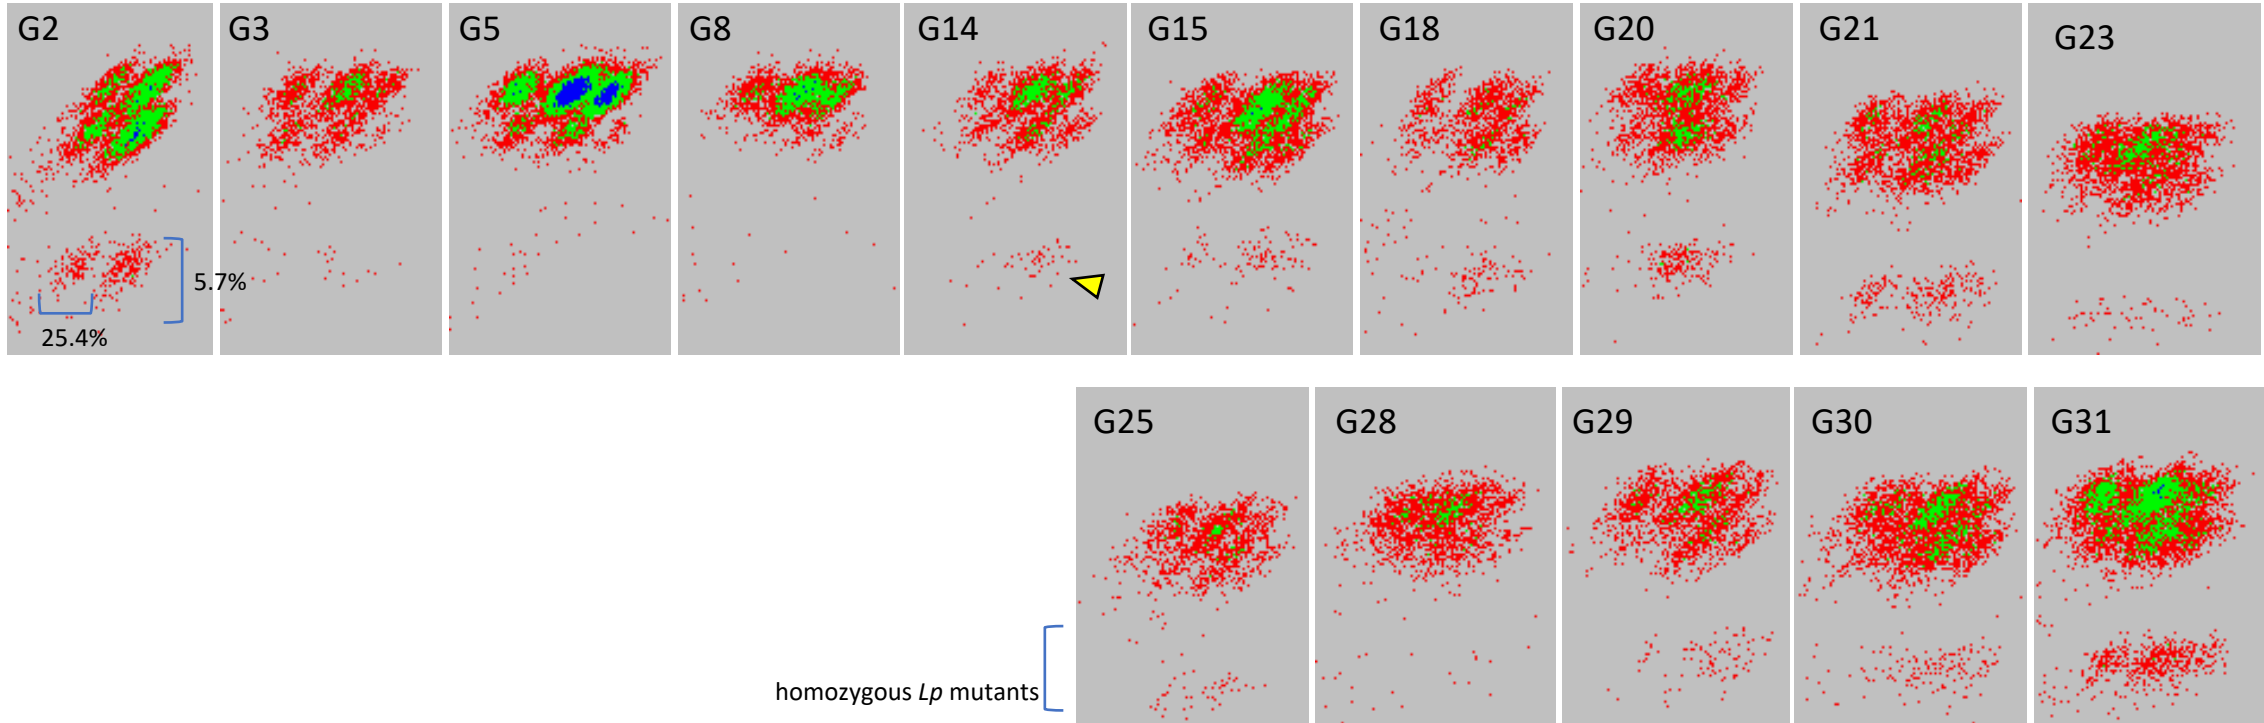

Population 3 : G0 = ~ 1:3 mix of G10 individuals from Population 1 : WT

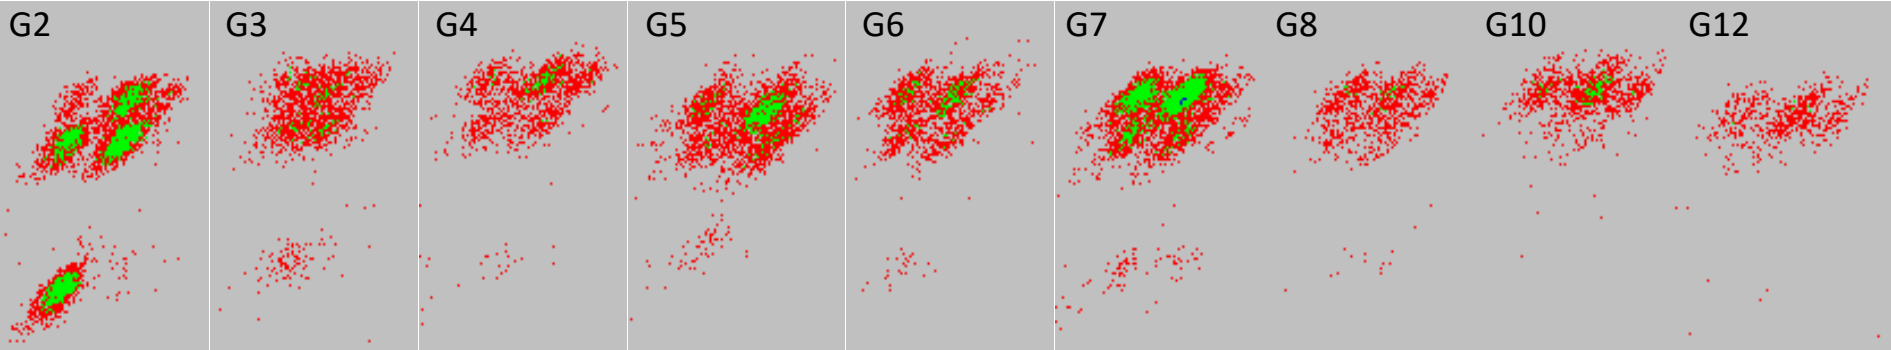

Population 4 : G0 = ~ 1:2 mix G10 individuals from Population 1 : WT

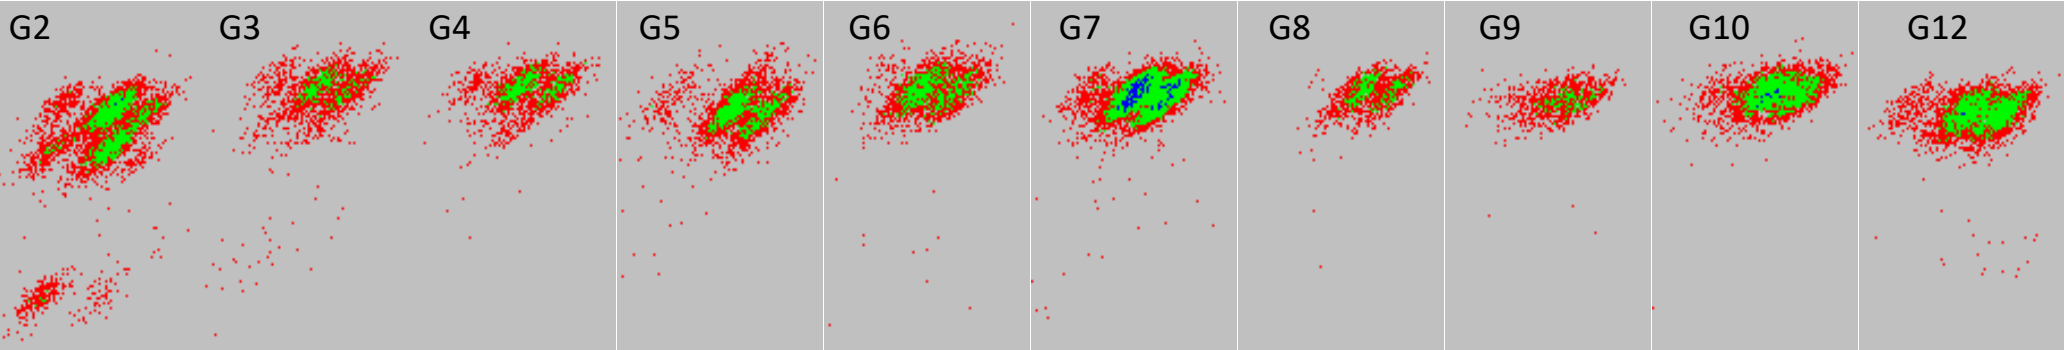

Population 5 : G0 = ♂  $\frac{SagGD^{vasa}}{Y}$  ;  $\frac{Lp::Sc2A10}{Lp::Sc2A10}$  × ♀ WT

(from G16 of Population 1)

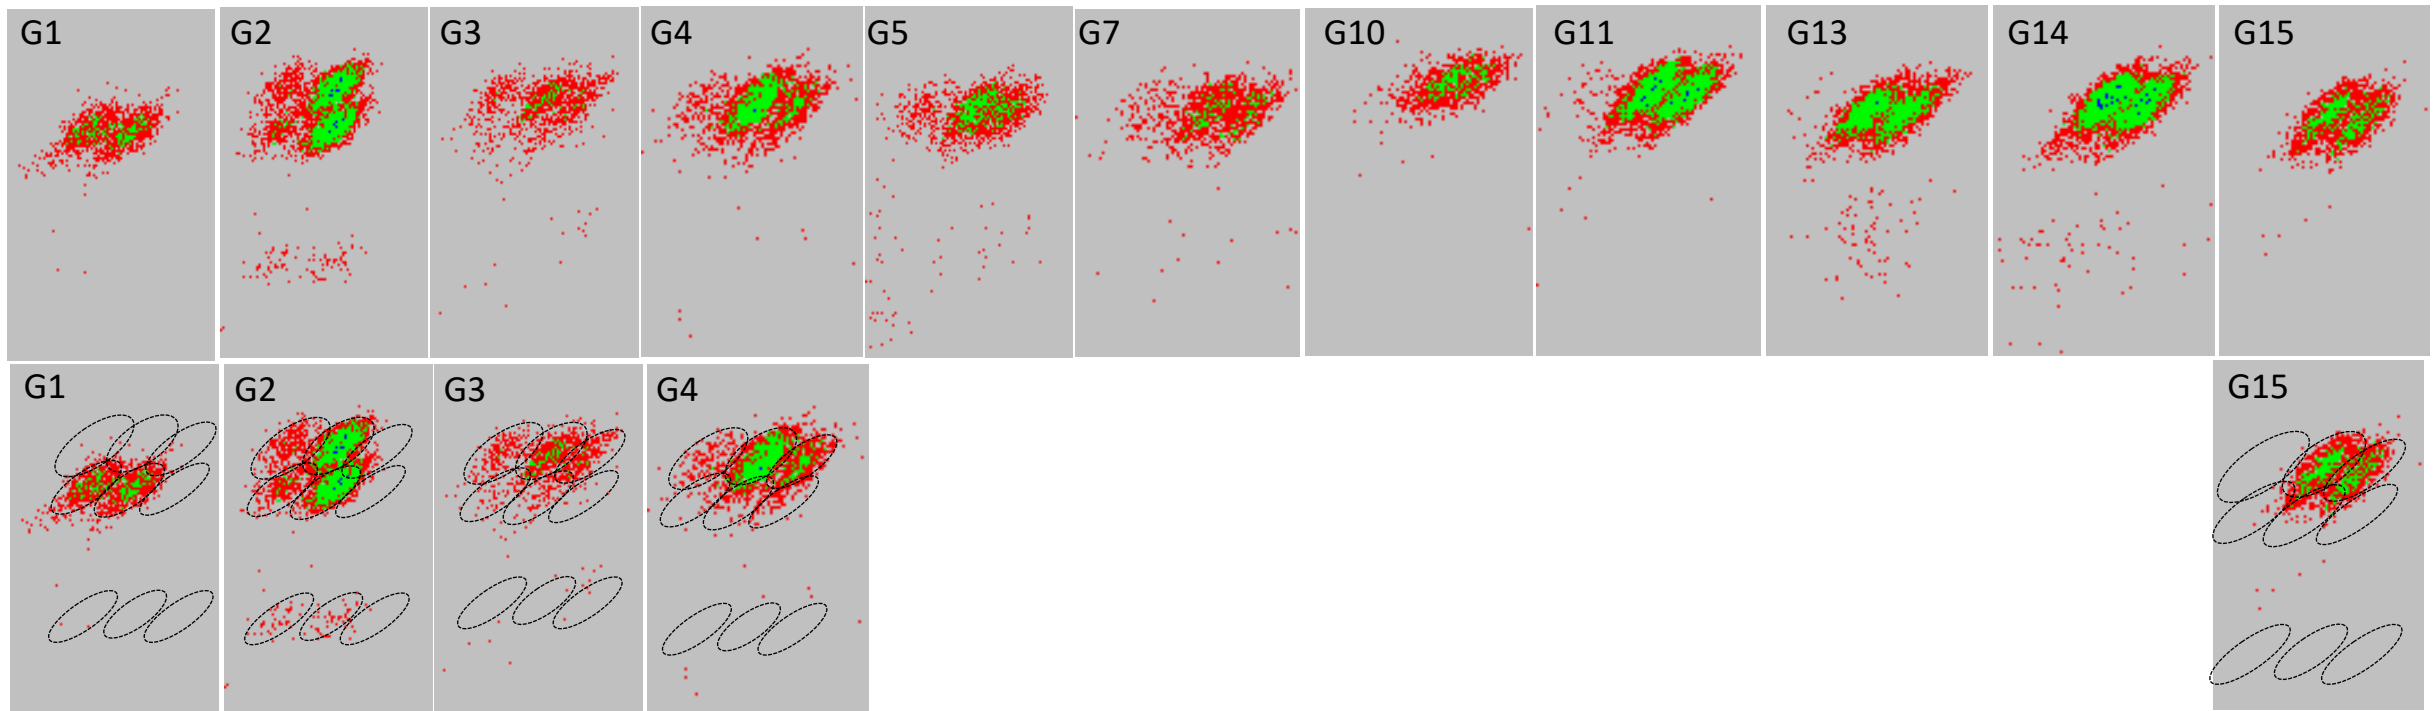

Population 6 : G0 = ♀  $\frac{SagGD^{vasa}}{SagGD^{vasa}}$  ;  $\frac{Lp::Sc2A10}{Lp::Sc2A10}$  x ♂ WT

(from G16 of Population 1)

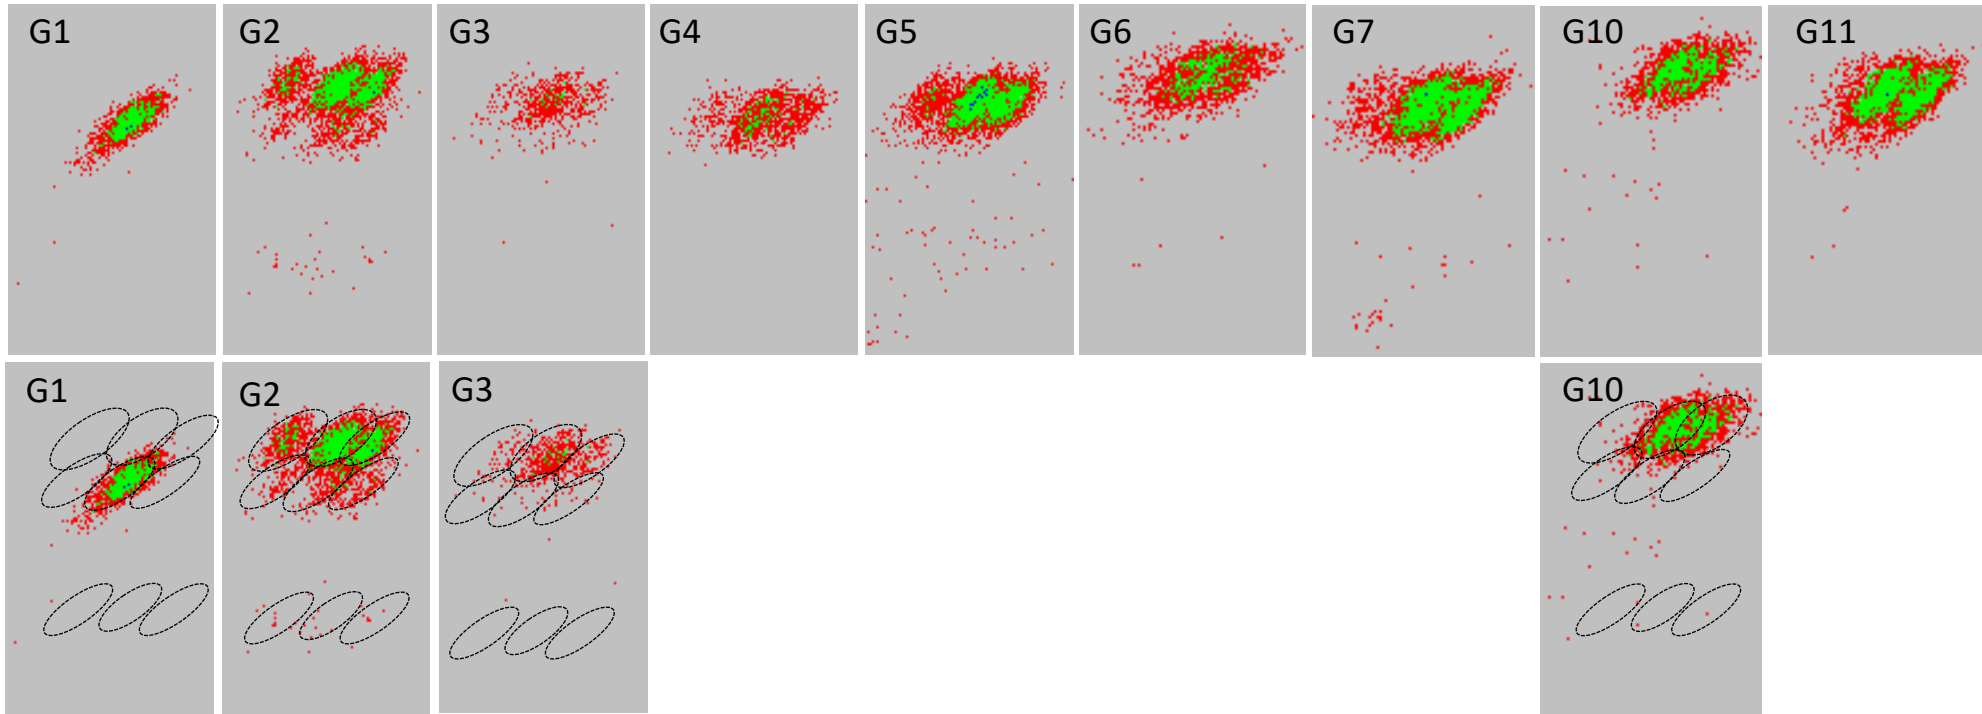

Population 7 : G0 = ♂  $\frac{SagGD^{vasa}}{Y}$  ;  $\frac{Lp::Sc2A10}{+}$  × ♀ WT

(from G1 of Population 5)

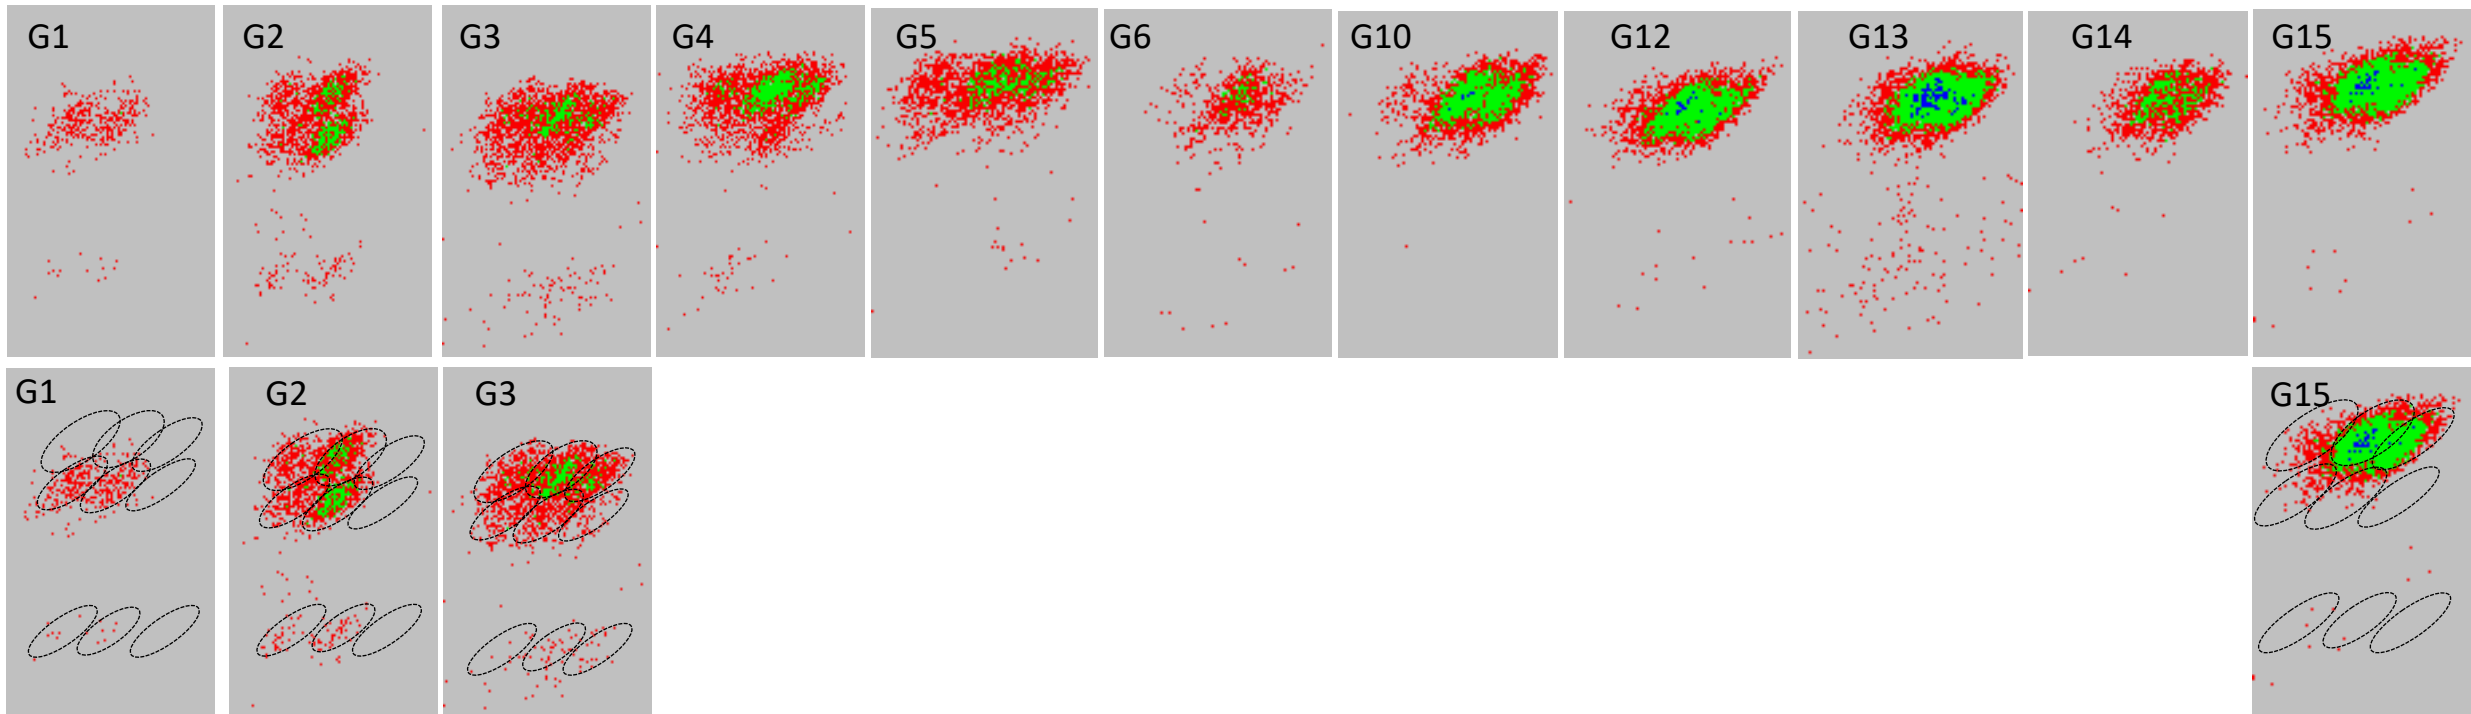

Population 8 : G0 = ♀  $\frac{SagGD^{vasa}}{+}$  ;  $\frac{Lp::Sc2A10}{+}$  x ♂ WT

(from G1 of Population 5)

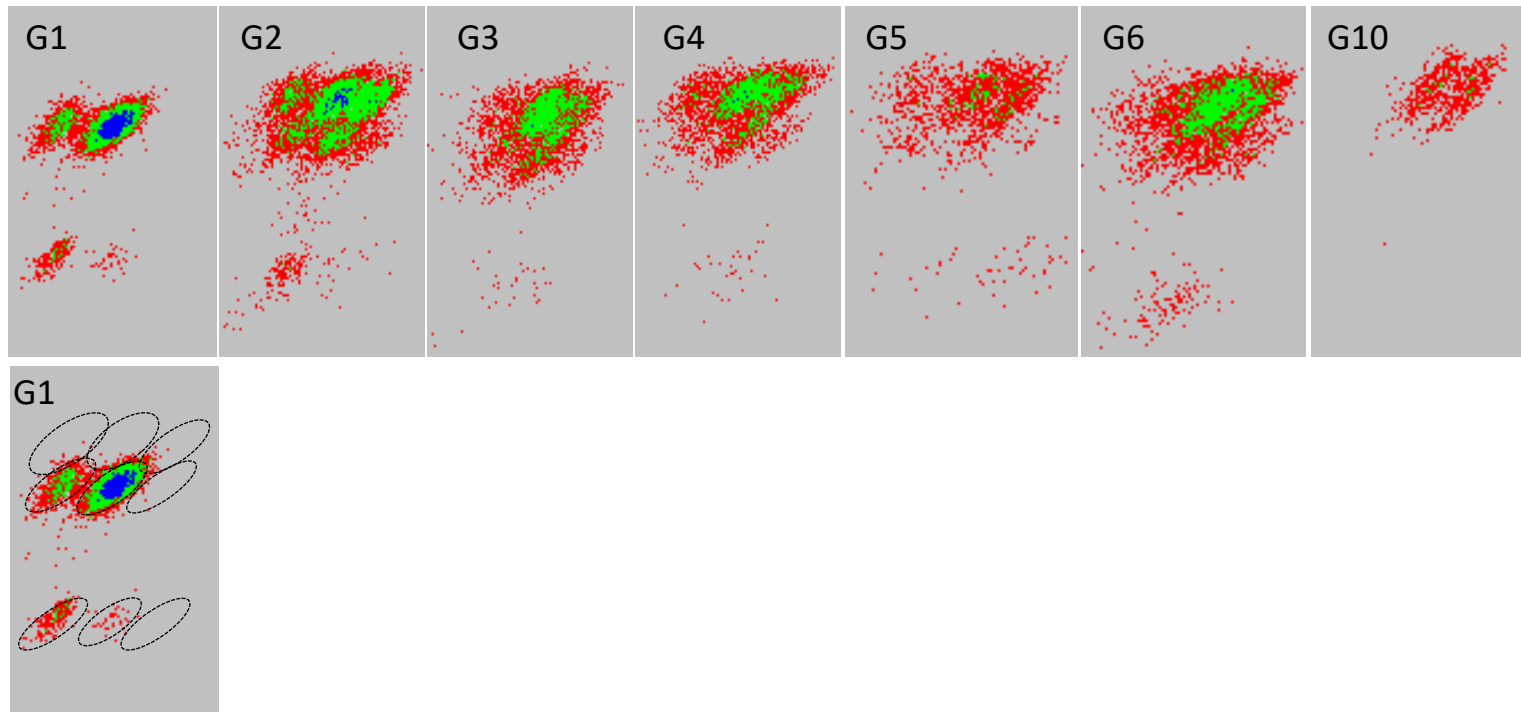

Supplement: supp [file elife-93142-supp-v1.zip]
