# Supplementary material for: A population modification gene drive targeting both Saglin and Lipophorin impairs Plasmodium transmission in Anopheles mosquitoes
Source: eLife journal article supplement (doi:10.7554/elife.93142), 2023-12-05

Figure 1A – original image with relevant labels

Double-stranded RNA injected in the mosquitoes  
for RNAi:

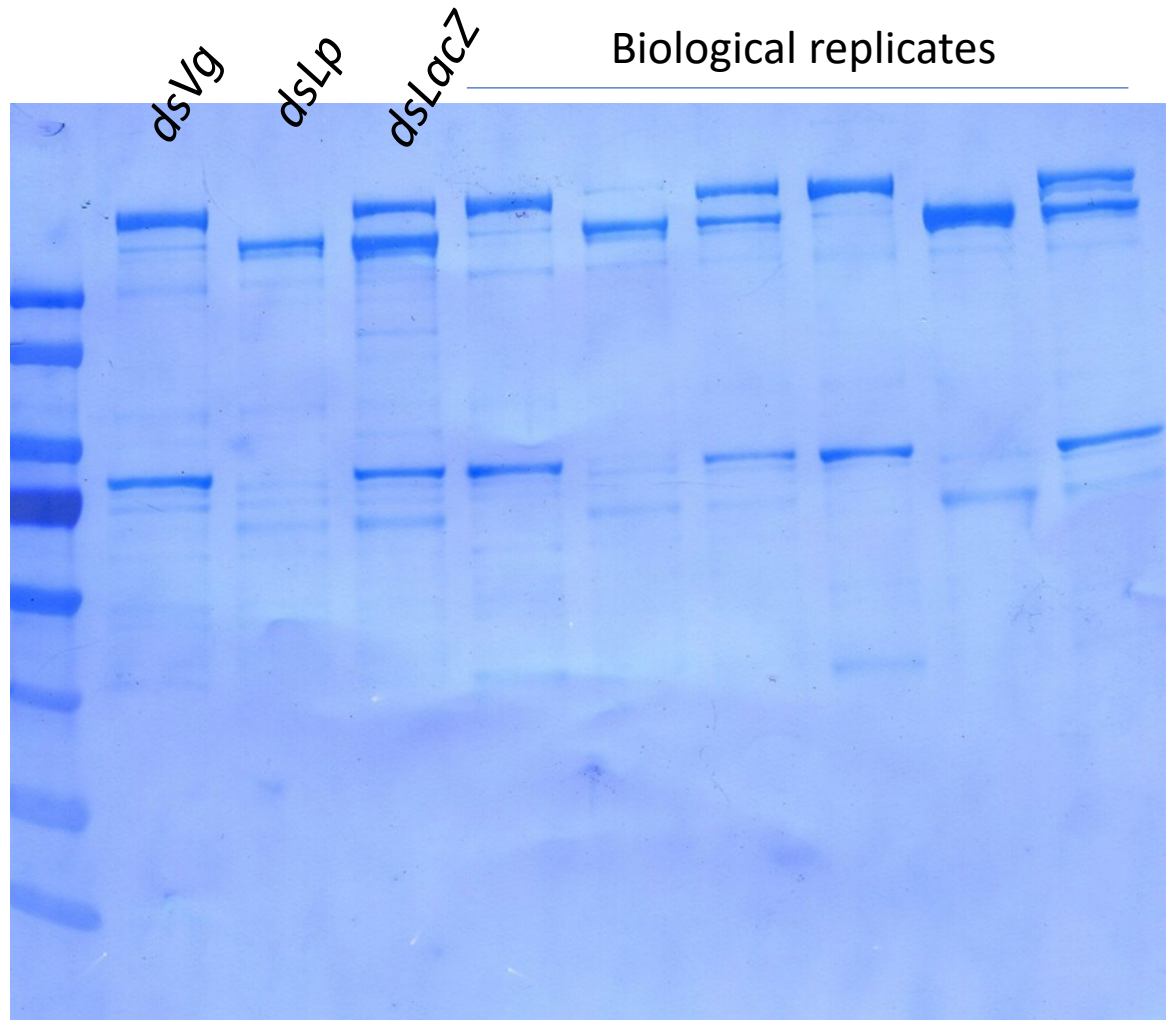

Supplement: supp [file elife-93142-supp-v1.zip]
