# Supplementary material for: A population modification gene drive targeting both Saglin and Lipophorin impairs Plasmodium transmission in Anopheles mosquitoes
Source: eLife journal article supplement (doi:10.7554/elife.93142), 2023-12-05

Figure 3C

Membrane probed with Anti-Saglin antibody

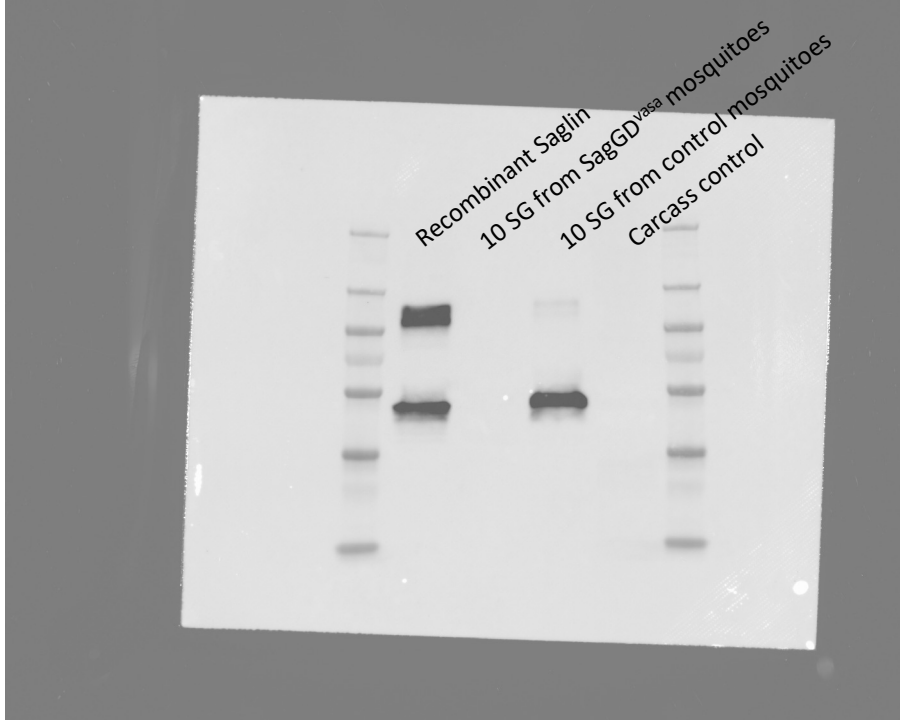

Membrane probed with control human serum

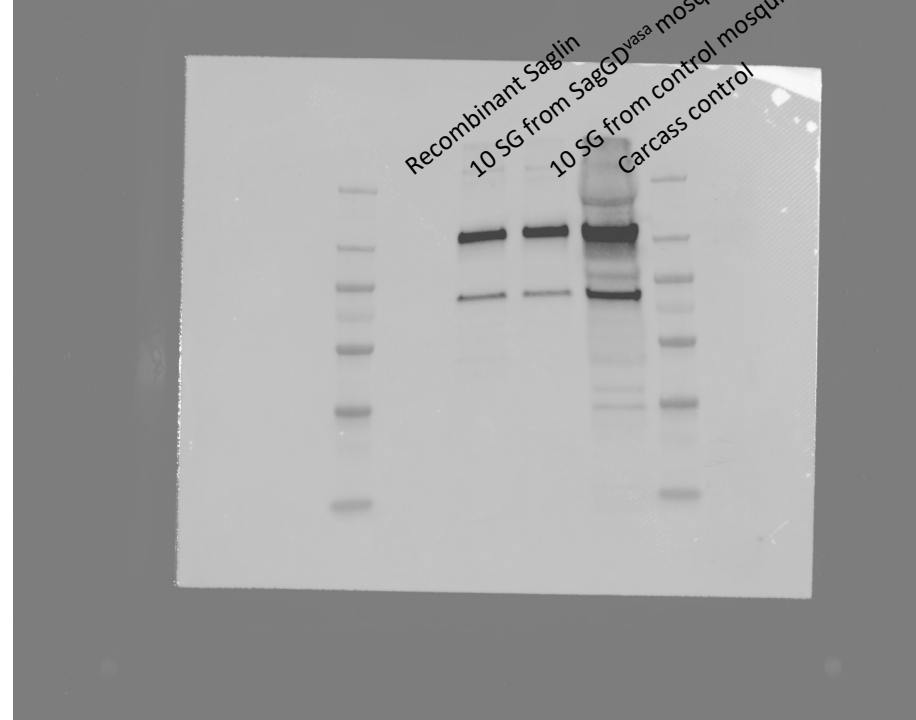

Supplement: supp [file elife-93142-supp-v1.zip]
