# Supplementary material for: A population modification gene drive targeting both Saglin and Lipophorin impairs Plasmodium transmission in Anopheles mosquitoes
Source: eLife. 2023 Dec 5;12:e93142. doi: 10.7554/eLife.93142 (PMC10786457; doi:10.7554/eLife.93142)
Supplement: Supplementary file 4. — Mice are grouped by categories according to the genotype of the Plasmodium-carrying mosquitoes biting them or by the strain of parasite infecting them. Groups of 10 infected mosquito females (transgenic or their wild-type siblings grown in the same culture), were allowed to bite a mouse. Colored cells indicate the stage at which infected mice were sacrificed to prevent the appearance of malaria symptoms. n.d=not determined. ‘D’ in the third column indicates a mouse bitten by transgenic mosquitoes that showed a clearly delayed parasitemia compared to the controls. In two cases (indicated in third column), the mouse was bitten by fewer than 6 WT mosquitoes. [file elife-93142-supp4.xlsx]

## Sheet: Sheet1
MOUSE PARASITEMIA FOLLOWING BITE-BACK EXPERIMENTS
A. Mice bitten by homozygous Lp::Sc2A10 mosquitoes and their wild-type sibling controls
	Mosquito genotype		Parasitemia in bitten mouse
Expt. 1 (day 18)			day 4	day 5	day 9	day 10
June 29, 2019	control		0.01 %	0.04 %	6.7 %
	control		0.03 %	0.24 %
	control		0.07 %	0.62 %
	hmz tsg		0 %	0 %	0 %	0 %
	hmz tsg		0 %	0 %	0 %	0 %
	hmz tsg		0 %	0 %	0 %	0 %
Expt. 2 (day 16)			day 4	day 5	day 6	day 10	day 14
July 12, 2019	control		0.1 %	0.7%	2.7 %
	hmz tsg		0 %	0 %	0 %	0 %	0 %
	hmz tsg		0 %	0 %	0 %	0 %	0 %
Expt. 3 (day 16)			day 5	day 6	day 7	day 8	day 9	day 12	day 14
July 17, 2019	control		0 %	0 %	0 %	0 %	0 %	0 %	0 %
	control		0.02 %	0.15 %	0.98%	3.17%	4,62%
	control		0.16 %	1.01 %	3.20%
	control		0.01 %	0.14 %	0.93%	3.76%	7,46%
	hmz tsg		0 %	0 %	0 %	0 %	0 %	0 %	0 %
	hmz tsg		0 %	0 %	0 %	0 %	0 %	0 %	0 %
	hmz tsg	D	0 %	0.02 %	0.18 %	1.14 %	3.20 %
	hmz tsg		0 %	0.01 %	0 %	0 %	0 %	0 %	0 %
Expt. 4 (day 18)			day 4	day 5	day 6	day 7	day 10	day 11
July 19, 2019	control		0 %	0.04%	0.30%	2%
	control		0 %	0.01%	0.05%	0.42%
	control		0 %	0.03%	0.32%	1.76%
	hmz tsg		0.01%	0.02 %	0.16 %	1.46 %
	hmz tsg		0 %	0 %	0 %	0 %	0 %	0 %
	hmz tsg		0 %	0 %	0 %	0 %	0 %	0 %
Expt. 5 (day 20)			day 4	day 7	day 8	day 9	day 10
August 5, 2019	control		0 %	1.5 %	1.3 %	1.3 %	7.8 %
	control		0 %	1.3%	3.3 %	2.8 %	4.2 %
	hmz tsg		0 %	0 %	0 %	0 %	0 %
Expt. 9 (day 16)			day 4	day 5	day 6	day 7	day 10	day 11	day 12
October 4, 2019	control		0.04 %	0.4 %	2.2 %	5.2 %
	control		0.06 %	0.5 %	2.5 %	5.5 %
	control		0 %	0.1 %	0.5 %	2.1 %	4.64 %
	control		0.02 %	0.2 %	1.2 %	3.6 %
	control		0.11 %	0.8 %	3.3 %	4.7 %
	hmz tsg	D	0 %	0 %	0.3 %	1.4 %	4.66 %
	hmz tsg	D	0 %	0 %	0.2 %	0.3 %	4.22 %
	hmz tsg	D	0 %	0 %	0.2 %	2.1 %	6.03 %
	hmz tsg		0 %	0 %	0.1 %	0 %	0.04 %	0 %	0 %
	hmz tsg		0 %	0 %	0.1 %	0.1 %	0.01 %	0 %	0 %
Expt. 10 (day 20)			day 6	day 7	day 8	day 9
October 10, 2019	control		4.54 %
	control		1.18 %	3.43%
	control		0.42 %	2 %	4.25 %
	control		0.22 %	1.14 %	2.93 %
	control		0.69 %	2.69 %	5/58 %
	hmz tsg		n.d.	0 %	0 %	0 %
	hmz tsg		n.d.	1.17 %	3.57 %
	hmz tsg		n.d.	0.01 %	0.04 %	0 %
	hmz tsg		n.d.	0 %	0 %	0 %
	hmz tsg		n.d.	2.29 %	6.1 %
	hmz tsg		n.d.	0 %	0.07%	0 %
Expt. 11 (day 17)			day 6	day 7	day 9	day 12
June 25, 2021	control		0.16 %	1.28 %
	control		0.18%	1.04%
	hmz tsg		0 %	0 %	0 %	0 %
	hmz tsg		0.03%	0.26 %
	hmz tsg		0.43%	1.63 %
	hmz tsg		0 %	0 %	0 %	0 %
Expt. 12 (day 18)			day 4	day 8	day 9	day 12
October 25, 2021	control	4 mosq bit	0 %	1.96 %
	control		0 %	3.47 %
	control		0.06 %	2.56 %
	hmz tsg	5 mosq bit	0 %	0 %	0 %	0 %
Expt. 13 (day 18)			day 4	day 5	day 6	day 7	day 10
October 29, 2021	control		0.02 %	0.11 %	0.89 %	2.69 %
	control		0.02 %	0.21 %	1.22 %	3.39 %
	control		0.02 %	0.18 %	1.28 %	2.94 %
	hmz tsg		0 %	0 %	0 %	0 %	0 %
	hmz tsg		0 %	0 %	0 %	0 %	0 %
	hmz tsg	D	0 %	0 %	0 %	0.05 %	8 %
	hmz tsg	D	0.01 %	0.08 %	0.7 %	2.32 %
B. Mice bitten by heterozygous Lp::Sc2A10 mosquitoes and their wild-type sibling controls
Expt. 6 (day 17)			day 4	day 5	day 6	day 9	day 11	day 12
September 6, 2019	control		0 %	0 %	0 %	0 %	0 %	0 %
	control		0 %	0.01 %	0.06 %	6.65 %
	control		0.03 %	0.22 %	1.88%
	het tsg		0 %	0 %	0 %	0.03 %	0 %	0 %
	het tsg		0 %	0 %	0 %	0 %	0.03 %	0 %
	het tsg		0 %	0 %	0 %	0 %	0.03 %	0 %
Expt. 7 (day 20)			day 4	day 7	day 8	day 9	day 11	day 12
September 9, 2019	control		0 %	0.09 %	0.81%	4.51%
	control		0.02 %	3.68 %
	het tsg		0 %	0.02 %	0 %	0 %	0 %	0 %
	het tsg		0 %	0 %	0 %	0 %	0 %	0 %
Expt. 12 (day 18)			day 4	day 8	day 9	day 12
October 25, 2021	control		0 %	3.57 %
	control		0 %	3.47 %
	control		0.01%	4.46 %
	het tsg		0 %	2.93 %
	het tsg		0 %	0 %	0 %	0 %
	het tsg		0 %	0 %	0 %	0 %
Expt. 13 (day 18)			day 4	day 5	day 6	day 7
October 29, 2021	control		0.02 %	0.16%	0.92 %	2.9 %
	control		0.03 %	0.32 %	1.98 %	3.93 %
	control		0%	0.03 %	0.17 %	0.84 %
	het tsg		0.01 %	0.08 %	0.58 %	2.59 %
	het tsg		0 %	0.03 %	0.31 %	1.58 %
	het tsg		0.03 %	0.18 %	1.23 %	3.58 %
Expt. 14 (day 18)			day 5	day 7	day 10	day 12
November 19, 2021	control		0.15 %	3.4 %
	het tsg		0 %	0 %	0 %	0 %
C. Mice bitten by homozygous Lp::Sc2A10 mosquitoes and their wild-type sibling controls infected either with wild-type P.berghei or with
P. berghei expressing P. falciparum CSP
Expt. 8 (day 18)			day 4	day 7	day 8	day 10	day 11
September 16, 2019	control		0 %	0.54 %	2.10 %
	control		0.09 %
	control		0.1 %
with
P.berghei-PfCSP	hmz tsg		0.01 %	0.07 % *	0 %	0 %	0 %
	hmz tsg		0 %	0.03 % *	0 %	0 %	0 %
	hmz tsg		0 %	0.03 % *	0 %	0 %	0 %
	hmz tsg		0.01 %	0.08 % *	0 %	0 %	0 %
	control		0.11 %
	control		0.03 %	5.58 %
	control		0 %	0.32 %	1.32 %
	control		0.04%	2.32 %
with						* overerestimation due to a
P. berghei- WT	hmz tsg		0.02	3.12 %		technical problem with the
	hmz tsg		0.01 %	3.76 %		flow cytometer
	hmz tsg		0.01%	2.38 %
	hmz tsg		0 %	1.08 %
	hmz tsg		0 %	1 %
D. Mice bitten by homozygous SagGD, Lp::Sc2A10 mosquitoes and wild-type controls infected with P. berghei expressing P. falciparum CSP
Expt. 15 (day 18)			day 4	day 6	day 7	day 10	day 13
February 11, 2022	control		0.02 %	0.86%	2.7 %
	control		0 %	0.23 %	1.41 %
	control		0 %	0.24 %	1.36 %
	control		0 %	0.08 %	0.62 %
	hmz tsg		0 %	0 %	0 %	0 %	0 %
	hmz tsg		0 %	0 %	0 %	0 %	0 %
	hmz tsg		0 %	0 %	0 %	0 %	0 %
	hmz tsg		0 %	0 %	0 %	0 %	0 %
	hmz tsg		0 %	0 %	0 %	0 %	0 %
	hmz tsg		0 %	0 %	0 %	0 %	0 %
E. Same as (D) but SagGD, Lp::Sc2A10 mosquitoes blindly taken from generation 4 of population 6 (SagGDvasa not 100% homozygous)
Exp. 16 (day 19)				day 6	day 7	day 9	day 13
June 7, 2022	tsg			0 %	0 %	0 %	0 %
	tsg			0 %	0 %	0 %	0 %
	tsg			0.29 %	1.42 %
	tsg			0.28 %	1.75 %
	tsg			0 %	0 %	0 %	0 %
	tsg			0 %	0 %	0 %	0 %
